# Supplementary material for: Prognostic relevance of mutations and copy number alterations assessed with targeted next generation sequencing in IDH mutant grade II glioma
Source: Springer Nature journal article supplement (doi:10.1007/s11060-018-2867-8), 2018-04-16
Supplement: MOESM1 [file 15702402]

# Supplementary table 1

## overview of targeted genes and chromosomes

| Whole gene    | Hotspots                     | SNPs                                         | SNaPshot      |
|---------------|------------------------------|----------------------------------------------|---------------|
| <i>TP53</i>   | <i>EGFR</i> (exon 3+15)      | chr1                                         | TERT promoter |
| <i>FUBP1</i>  | <i>H3F3A</i> (exon 2)        | chr10 (including <i>PTEN</i> )               |               |
| <i>PTEN</i>   | <i>IDH2</i> (exon 4)         | chr12 (including <i>MDM2</i> )               |               |
| <i>CIC</i>    | <i>IDH1</i> (exon 4)         | chr19                                        |               |
| <i>CDKN2A</i> | <i>PIK3CA</i> (exon 10 + 21) | chr7 (including <i>EGFR</i> and <i>MET</i> ) |               |
| <i>NOTCH1</i> | <i>BRAF</i> (exon 11+15)     | chr9 (including <i>CDKN2A</i> )              |               |
| <i>ATRX</i>   |                              | chrY                                         |               |

# Supplementary figure 1

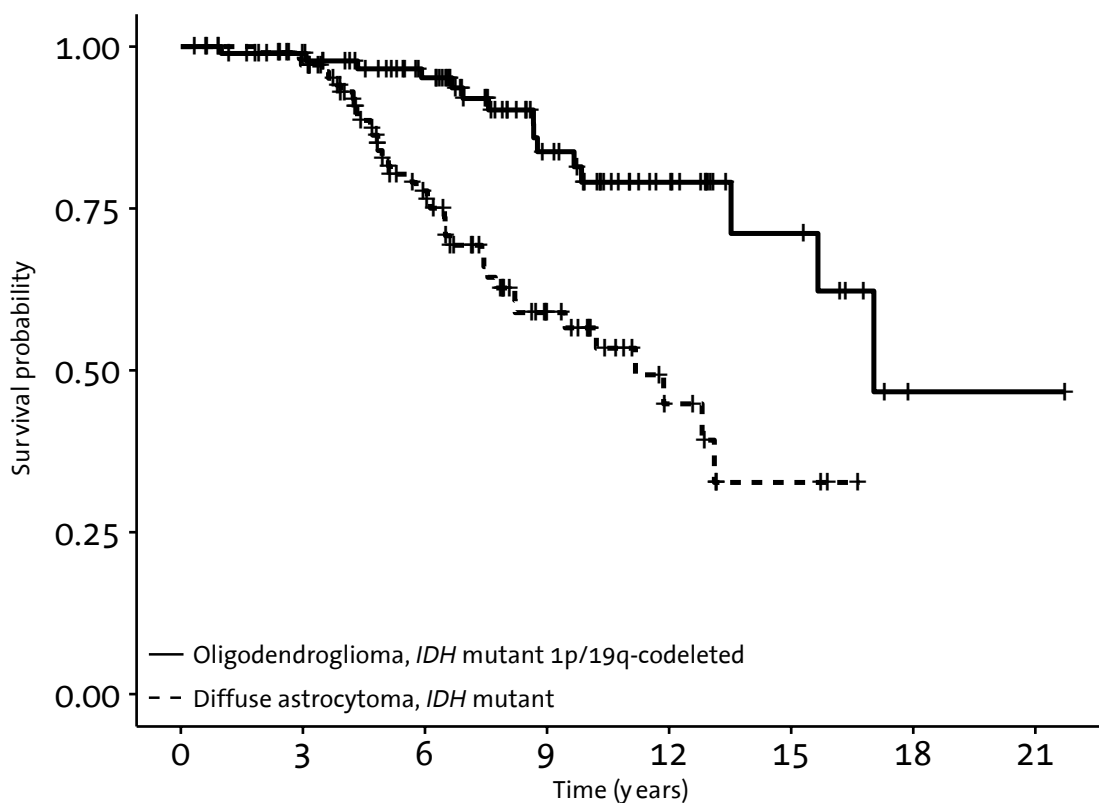

### Number at risk

|     |     |     |    |    |    |   |   |   |
|-----|-----|-----|----|----|----|---|---|---|
| —   | 95  | 88  | 69 | 38 | 20 | 9 | 1 | 1 |
| - - | 112 | 101 | 59 | 27 | 9  | 3 | 0 | 0 |

Kaplan-Meier plot with overall survival stratified by WHO 2016 molecular subgroup. *IDH* mutated 1p/19q-codeleted patients have significantly longer overall survival (median OS 17.0 years) compared to *IDH* mutated astrocytoma patients (median OS 11.2 years) (Log rank test:  $P < 0.0001$ ).
